# Supplementary material for: Safety and Efficacy of Mevidalen in Lewy Body Dementia: A Phase 2, Randomized, Placebo‐Controlled Trial
Source: PubMed Central journal article supplement — Mov Disord. 2021 Dec 2;37(3):513–24. doi: 10.1002/mds.28879 (PMC9300146; doi:10.1002/mds.28879), 2021-12-02
Supplement: MDS-37-513-s001.pdf [file MDS-37-513-s001.pdf]

A)

## MDS-UPDRS Part I Items

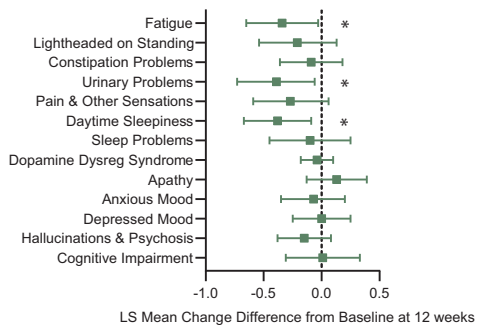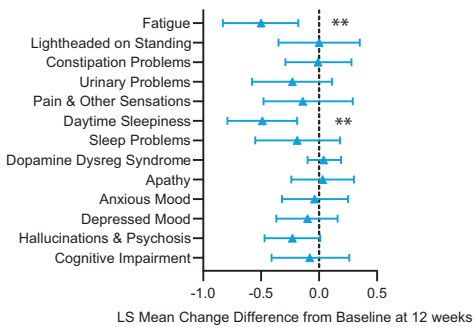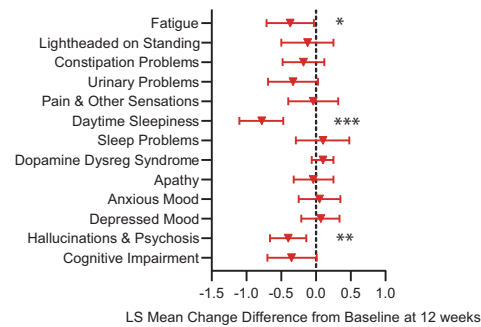

B)

## MDS-UPDRS Part II Items

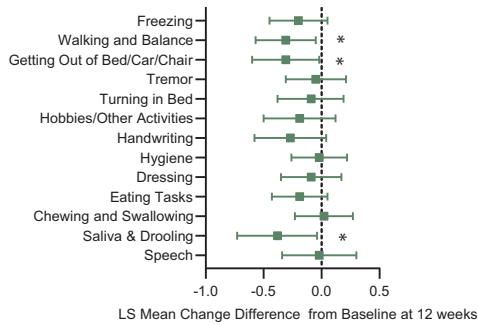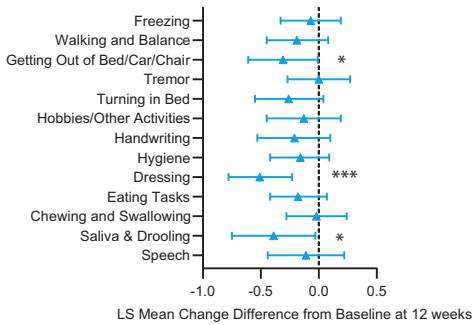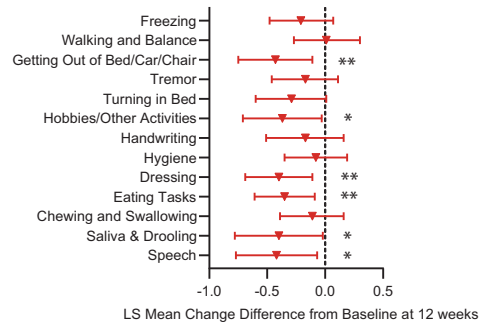

C)

## MDS-UPDRS Part III Items

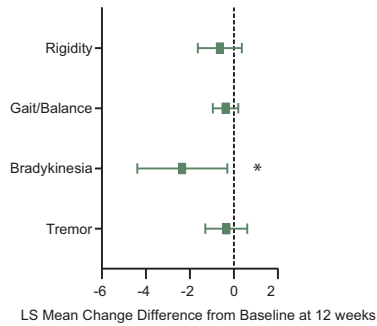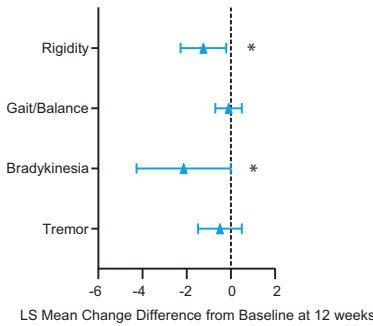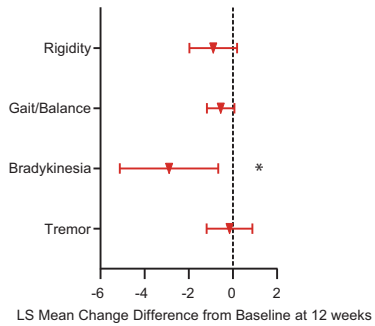

D)

## MDS-UPDRS Part IV Items

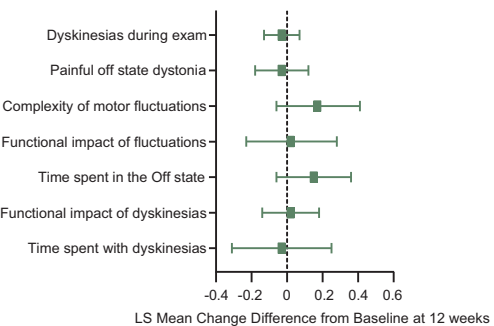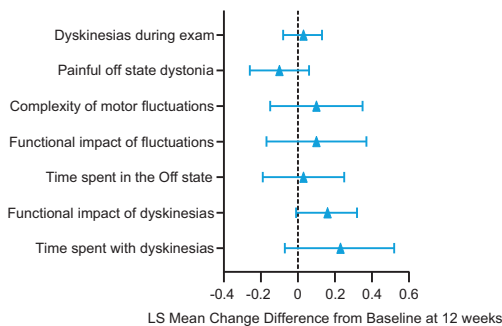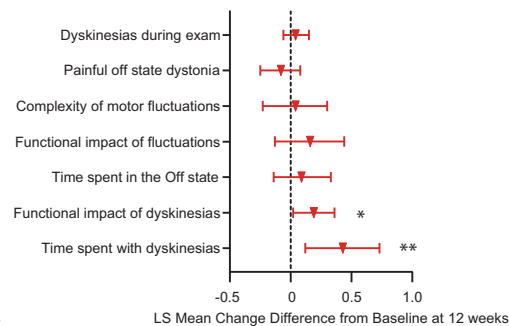

■ 10 mg LY3154207

▲ 30 mg LY3154207

▼ 75 mg LY3154207
