# Supplementary figures and images for: Safety and Efficacy of Mevidalen in Lewy Body Dementia: A Phase 2, Randomized, Placebo‐Controlled Trial
Source: PubMed Central journal article supplement — Mov Disord. 2021 Dec 2;37(3):513–24. doi: 10.1002/mds.28879 (PMC9300146; doi:10.1002/mds.28879), 2021-12-02

### A) Systolic Blood Pressure

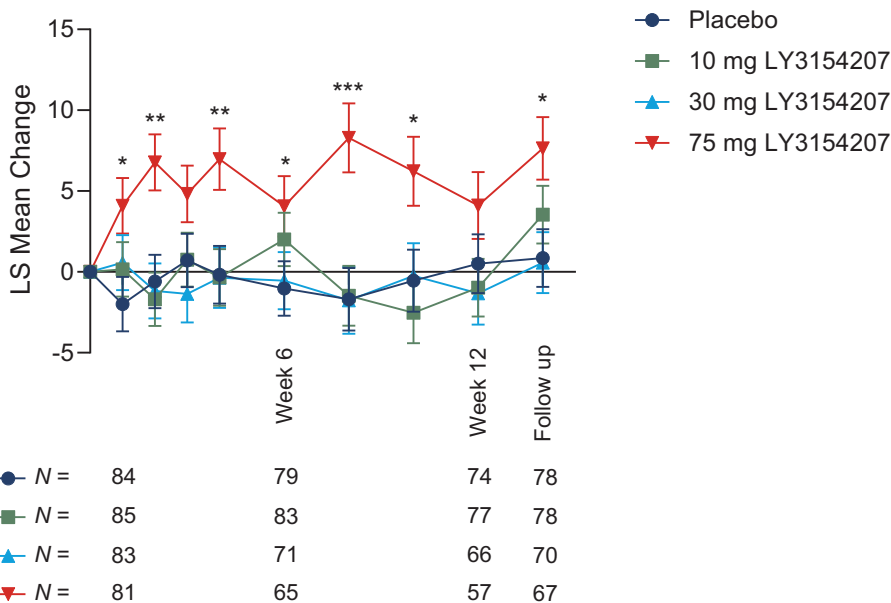

### B) Diastolic Blood Pressure

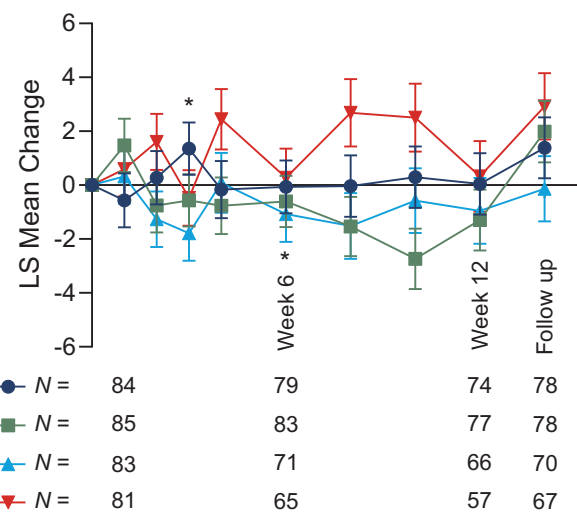

### C) Pulse Rate

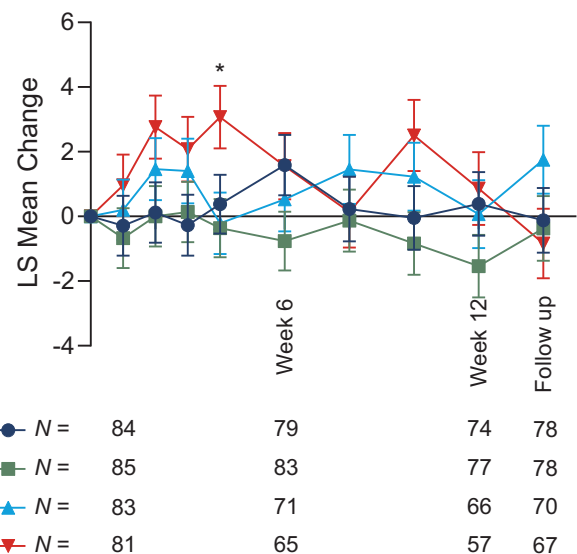

Supplement: MDS-37-513-s002.pdf [file MDS-37-513-s002.pdf]

# ESS

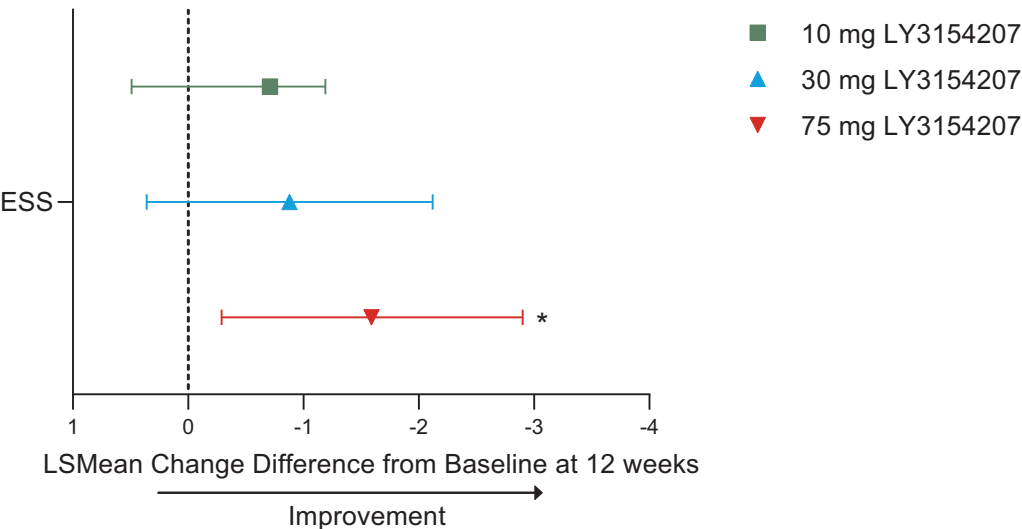

Supplement: MDS-37-513-s003.pdf [file MDS-37-513-s003.pdf]
